# Supplementary material for: Economic Evaluation of Oral Cancer Screening Programs: Review of Outcomes and Study Designs
Source: MDPI journal article supplement (doi:10.3390/healthcare11081198), 2023-04-21
Supplement: s1 [file s1]

**Supplementary Material Table S4: Assessment using Philips criteria for model-based economic evaluations**

| STRUCTURE |    |                                                                                                                                                                                            | Dedhia<br>2011 | Kumdee<br>2018 | Speight<br>2006 | Meij<br>2002 |
|-----------|----|--------------------------------------------------------------------------------------------------------------------------------------------------------------------------------------------|----------------|----------------|-----------------|--------------|
| S1        | 1  | Is there a clear statement of the decision problem?                                                                                                                                        | Y              | Y              | Y               | Y            |
|           | 2  | Is the objective of the model specified and consistent with the stated decision problem?                                                                                                   | Y              | Y              | Y               | Y            |
|           | 3  | Is the primary decision-maker specified?                                                                                                                                                   | N              | Y              | Y               | N            |
| S2        | 4  | Is the perspective of the model stated clearly?                                                                                                                                            | Y              | Y              | Y               | N            |
|           | 5  | Are the model inputs consistent with the stated perspective?                                                                                                                               | N              | Y              | Y               | NA           |
| S3        | 6  | Is the structure of the model consistent with a coherent theory of the health condition under evaluation?                                                                                  | Y              | Y              | Y               | Y            |
|           | 7  | Are the sources of the data used to develop the structure of the model specified?                                                                                                          | Y              | Y              | Y               | Y            |
| S4        | 8  | Are the structural assumptions reasonable given the overall objective, perspective and scope of the model?                                                                                 | Y              | Y              | Y               | Y            |
| S5        | 9  | Is there a clear definition of the options under evaluation?                                                                                                                               | Y              | Y              | Y               | Y            |
|           | 10 | Have all feasible and practical options been evaluated?                                                                                                                                    | Y              | Y              | Y               | Y            |
|           | 11 | Is there justification for the exclusion of feasible options?                                                                                                                              | Y              | Y              | Y               | Y            |
| S6        | 12 | Is the chosen model type appropriate given the decision problem and specified casual relationships within the model?                                                                       | Y              | Y              | Y               | Y            |
| S7        | 13 | Is the time horizon of the model sufficient to reflect all important differences between the options?                                                                                      | Y              | Y              | Y               | N            |
| S8        | 14 | Do the disease states (state transition model) or the pathways (decision tree model) reflect the underlying biological process of the disease in question and the impact of interventions? | Y              | Y              | Y               | ?            |
| S9        | 15 | Is the cycle length defined and justified in terms of the natural history of disease?                                                                                                      | Y              | Y              | Y               | N            |
| D1        | 16 | Are the data identification methods transparent and appropriate given the objectives of the model?                                                                                         | Y              | Y              | Y               | Y            |
|           | 17 | Where choices have been made between data sources, are these justified appropriately?                                                                                                      | Y              | Y              | Y               | NA           |
|           | 18 | Where expert opinion has been used are the methods described and justified?                                                                                                                | N              | Y              | Y               | ?            |
| D2A       | 19 | Is the choice of baseline data described and justified?                                                                                                                                    | Y              | Y              | Y               | Y            |
|           | 20 | Are transition probabilities calculated appropriately?                                                                                                                                     | Y              | Y              | Y               | Y            |
|           | 21 | Has a half-cycle correction been applied to both costs and outcomes?                                                                                                                       | N              | N              | N               | N            |
|           | 22 | If not, has the omission been justified?                                                                                                                                                   | N              | N              | N               | N            |
| D2B       | 23 | Have the methods and assumptions used to extrapolate short-term results to final outcomes been documented and justified?                                                                   | NA             | NA             | NA              | Y            |
|           | 24 | Are the costs incorporated into the model justified?                                                                                                                                       | N              | Y              | Y               | ?            |
|           | 25 | Has the source for all costs been described?                                                                                                                                               | Y              | Y              | Y               | Y            |
|           | 26 | Have discount rates been described and justified given the target decision maker?                                                                                                          | Y              | Y              | Y               | N            |
| D2C       | 27 | Are the utilities incorporated into the model appropriate?                                                                                                                                 | Y              | Y              | Y               | Y            |
|           | 28 | Is the source of utility weights referenced?                                                                                                                                               | Y              | Y              | Y               | Y            |
| D3        | 29 | If data have been incorporated as distributions, has the choice of distributions for each parameter been described and justified?                                                          | NA             | NA             | Y               | NA           |
| D4D       | 30 | If data are incorporated as point estimates, are the ranges used for sensitivity analysis stated clearly and justified?                                                                    | Y              | Y              | Y               | Y            |
| D4C       | 31 | Has heterogeneity been dealt with by running the model separately for different subgroups?                                                                                                 | N              | N              | Y               | N            |
| C2        | 32 | Have the results been compared with those of previous models and any differences in results explained?                                                                                     | Y              | Y              | Y               | Y            |
