# Supplementary material for: Economic Evaluation of Oral Cancer Screening Programs: Review of Outcomes and Study Designs
Source: MDPI journal article supplement (doi:10.3390/healthcare11081198), 2023-04-21
Supplement: s1 [file s1]

**Supplementary Material Table S3: Assessment using Quality of Health Economic Studies (QHES)**

| ITEMS        |                                                                                                                                                                                         | WEIGHT     | Dedhia<br>2011 | Huang<br>2019 | Kumdee<br>2018 | Speight<br>2006 | Subram-<br>aniam<br>2009 | Meij<br>2002 |
|--------------|-----------------------------------------------------------------------------------------------------------------------------------------------------------------------------------------|------------|----------------|---------------|----------------|-----------------|--------------------------|--------------|
| 1            | Was the study objective presented in a clear, specific, and measurable manner?                                                                                                          | 7          | Y              | Y             | Y              | Y               | Y                        | Y            |
| 2            | Were the perspective of the analysis (societal, third-party payer, and so on) and reasons for its selection stated?                                                                     | 4          | Y              | Y             | Y              | Y               | Y                        | N            |
| 3            | Were variable estimates used in the analysis from the best available source (i.e., Randomized Control Trial-Best, Expert Opinion-Worst)?                                                | 8          | Y              | Y             | Y              | Y               | Y                        | Y            |
| 4            | If estimates came from a subgroup analysis, were the groups pre-specified at the beginning of the study?                                                                                | 1          | N              | Y             | Y              | Y               | Y                        | Y            |
| 5            | Was uncertainty handled by: (i) statistical analysis to address random events; (ii) sensitivity analysis to cover a range of assumptions?                                               | 9          | Y              | Y             | Y              | Y               | Y                        | Y            |
| 6            | Was incremental analysis performed between alternatives for resources and costs?                                                                                                        | 6          | Y              | Y             | Y              | Y               | Y                        | Y            |
| 7            | Was the methodology for data abstraction (including value health states and other benefits) stated?                                                                                     | 5          | Y              | Y             | Y              | Y               | Y                        | Y            |
| 8            | Did the analytic horizon allow time for all relevant and important outcomes? Were benefits and costs that went beyond 1 year discounted (3–5%), justification given for discount rate?  | 7          | Y              | N             | Y              | Y               | N                        | N            |
| 9            | Was the measurement of costs appropriate and the methodology for the estimation of quantities and unit costs clearly described?                                                         | 8          | Y              | Y             | Y              | Y               | Y                        | N            |
| 10           | Was the primary outcome measure(s) for the economic evaluation clearly stated and were the major short term, long term and negative outcomes included?                                  | 6          | Y              | Y             | Y              | Y               | Y                        | Y            |
| 11           | Were the health outcomes measures/scales valid and reliable? If previously tested valid and reliable measures were not available, was justification given for the measures/scales used? | 7          | Y              | Y             | Y              | Y               | Y                        | Y            |
| 12           | Were the economic model (including structure), study methods and analysis, and the components of the numerator and denominator displayed in a clear transparent manner?                 | 8          | Y              | Y             | Y              | Y               | Y                        | Y            |
| 13           | Were the choice of economic model, main assumptions and limitations of the study stated and justified?                                                                                  | 7          | Y              | Y             | Y              | Y               | Y                        | Y            |
| 14           | Did the author(s) explicitly discuss direction and magnitude of potential biases?                                                                                                       | 6          | Y              | Y             | Y              | Y               | Y                        | Y            |
| 15           | Were the conclusions/recommendations of the study justified and based on the study results?                                                                                             | 8          | Y              | Y             | Y              | Y               | Y                        | Y            |
| 16           | Was there a statement disclosing the source of funding for the study?                                                                                                                   | 3          | Y              | Y             | Y              | Y               | Y                        | N            |
| <b>TOTAL</b> |                                                                                                                                                                                         | <b>100</b> | <b>99</b>      | <b>93</b>     | <b>100</b>     | <b>100</b>      | <b>93</b>                | <b>78</b>    |

**Instrument**
