# Supplementary material for: Economic Evaluation of Oral Cancer Screening Programs: Review of Outcomes and Study Designs
Source: MDPI journal article supplement (doi:10.3390/healthcare11081198), 2023-04-21
Supplement: s1 [file s1]

**Supplementary Material Table S2: Excluded full-text articles**

| Study                                                                                                                                                                                                                                                                                                                                                                                                           | Reason                                   |
|-----------------------------------------------------------------------------------------------------------------------------------------------------------------------------------------------------------------------------------------------------------------------------------------------------------------------------------------------------------------------------------------------------------------|------------------------------------------|
| Vokó Z, Túri G, Zsolyom A. A szájüregi szűrés költséghatékonyága Magyarországon. Cost-effectiveness of oral cancer screening in Hungary. <i>Orv Hetil.</i> 2016 Jul;157(29):1161-70                                                                                                                                                                                                                             | Unable to obtain a valid translated copy |
| Birur NP, Patrick S, Bajaj S, Raghavan S, Suresh A, Sunny SP, et al. A Novel Mobile Health Approach to Early Diagnosis of Oral Cancer. <i>The journal of contemporary dental practice.</i> 2018;19(9):1122-8.                                                                                                                                                                                                   | No economic evaluation                   |
| Balevi B. Assessing the usefulness of three adjunctive diagnostic devices for oral cancer screening: a probabilistic approach. <i>Community dentistry and oral epidemiology.</i> 2011;39(2):171-6.                                                                                                                                                                                                              | No economic evaluation                   |
| Brocklehurst P, Kujan O, O'Malley LA, Ogden G, Shepherd S, Glenny AM. Screening programmes for the early detection and prevention of oral cancer. <i>Cochrane Database of Systematic Reviews.</i> 2013(11).                                                                                                                                                                                                     | Systematic review                        |
| Cariati P, Cabello-Serrano A, Perez-de Perceval-Tara M, Monsalve-Iglesias F, Martínez-Lara I. Oral and oropharyngeal squamous cell carcinoma in young adults: A retrospective study in Granada University Hospital. <i>Medicina Oral, Patología Oral Y Cirugía Bucal.</i> 2017;22(6):e679-e85.                                                                                                                  | No economic evaluation                   |
| Chatterjee R, Gupta B, Bose S. Oral Screening for Pre-cancerous Lesions Among Areca-nut Chewing Population from Rural India. <i>Oral Health &amp; Preventive Dentistry.</i> 2015;13(6):509-14.                                                                                                                                                                                                                  | No economic evaluation                   |
| Cromwell I, Regier DA, Peacock SJ, Poh CF. Cost-Effectiveness Analysis of Using Loss of Heterozygosity to Manage Premalignant Oral Dysplasia in British Columbia, Canada. <i>The oncologist.</i> 2016;21(9):1099-106.                                                                                                                                                                                           | Genetic testing as a screening method    |
| Eadie D, MacKintosh AM, MacAskill S, Brown A. Development and evaluation of an early detection intervention for mouth cancer using a mass media approach. <i>British journal of cancer.</i> 2009;101 Suppl 2:S73-9.                                                                                                                                                                                             | No economic evaluation                   |
| Gandhi S, Lata J, Gandhi N. Fine needle aspiration cytology: a diagnostic aid for oral lesions. <i>Journal of Oral &amp; Maxillofacial Surgery</i> (02782391). 2011;69(6):1668-77.                                                                                                                                                                                                                              | Needle aspiration cytology               |
| Gonzalez Segura I, Secchi D, Carrica A, Barello R, Arbelo D, Burgos A, et al. Exfoliative cytology as a tool for monitoring pre-malignant and malignant lesions based on combined stains and morphometry techniques. <i>Journal Of Oral Pathology &amp; Medicine: Official Publication Of The International Association Of Oral Pathologists And The American Academy Of Oral Pathology.</i> 2015;44(3):178-84. | No economic evaluation                   |
| Hur C, Choi SE, Kong CY, Wang G-Q, Xu H, Polydorides AD, et al. High-resolution microendoscopy for esophageal cancer screening in China: A cost-effectiveness analysis. <i>World Journal Of Gastroenterology.</i> 2015;21(18):5513-23.                                                                                                                                                                          | Microendoscopy in esophageal cancer      |
| Jacobson JJ, Epstein JB, Eichmiller FC, Gibson TB, Carls GS, Vogtmann E, et al. The cost burden of oral, oral pharyngeal, and salivary gland cancers in three groups: commercial insurance, Medicare, and Medicaid. <i>Head &amp; Neck Oncology.</i> 2012;4:15-.                                                                                                                                                | No screening                             |
| Junaid M, Suhail A, Umer B, Nawaz A, Ikram M, Sobani Z-u-A, et al. Toluidine blue: yet another low cost method for screening oral cavity                                                                                                                                                                                                                                                                        | No economic evaluation                   |

|                                                                                                                                                                                                                                                                                                       |                                        |
|-------------------------------------------------------------------------------------------------------------------------------------------------------------------------------------------------------------------------------------------------------------------------------------------------------|----------------------------------------|
| tumour margins in third world countries. JPMA The Journal Of The Pakistan Medical Association. 2013;63(7):835-7.                                                                                                                                                                                      |                                        |
| Lee MK, Dodson TB, Nalliah RP, Karimbux NY, Allareddy V. Nine-year trend analysis of hospitalizations attributed to oral and oropharyngeal cancers in the United States. Oral Surgery, Oral Medicine, Oral Pathology & Oral Radiology. 2014;118(1):47-67.                                             | No screening                           |
| Lim K, Moles DR, Downer MC, Speight PM. Opportunistic screening for oral cancer and precancer in general dental practice: results of a demonstration study. British Dental Journal. 2003;194(9):497-502.                                                                                              | No economic evaluation                 |
| Nunn H, Lalli A, Fortune F, Croucher R. Oral cancer screening in the Bangladeshi community of Tower Hamlets: a social model. British journal of cancer. 2009;101 Suppl 2:S68-72.                                                                                                                      | No economic evaluation                 |
| Rahman MS, Ingole N, Roblyer D, Stepanek V, Richards-Kortum R, Gillenwater A, et al. Evaluation of a low-cost, portable imaging system for early detection of oral cancer. Head & neck oncology. 2010;2(1):10.                                                                                        | No economic evaluation                 |
| Sweeny L, Dean NR, Magnuson JS, Carroll WR, Clemons L, Rosenthal EL. Assessment of tissue autofluorescence and reflectance for oral cavity cancer screening. Otolaryngology--Head And Neck Surgery: Official Journal Of American Academy Of Otolaryngology-Head And Neck Surgery. 2011;145(6):956-60. | No economic evaluation                 |
| Uthoff RD, Song B, Sunny S, Patrick S, Suresh A, Kolur T, et al. Point-of-care, smartphone-based, dual-modality, dual-view, oral cancer screening device with neural network classification for low-resource communities. PloS one. 2018;13(12):e0207493.                                             | No economic evaluation                 |
| Yan SK, Wei BJ, Lin ZY, Yang Y, Zhou ZT, Zhang WD. A metabonomic approach to the diagnosis of oral squamous cell carcinoma, oral lichen planus and oral leukoplakia. Oral oncology. 2008;44(5):477-83.                                                                                                | Metabonomics-based diagnostic approach |
| Younis RT, Hesse SV, Anand VK. Evaluation of the utility and cost-effectiveness of obtaining histopathologic diagnosis on all routine tonsillectomy specimens. The Laryngoscope. 2001;111(12):2166-9.                                                                                                 | Histopathologic screening              |
| Meregaglia M, Cairns J, Licitra L, and Bossi P. The use of intensive radiological assessments in routine surveillance after treatment for head and neck cancer: An economic evaluation. Eur J Cancer, 2018. 93: p. 89-98. DOI: 10.1016/j.ejca.2018.01.082.                                            | Radiological assessment                |
