# Supplementary material for: Economic Evaluation of Oral Cancer Screening Programs: Review of Outcomes and Study Designs
Source: MDPI journal article supplement (doi:10.3390/healthcare11081198), 2023-04-21
Supplement: s1 [file s1]

### Supplementary Material Table S1: Search terms examples

#### COCHRANE Search Strategy for Systematic Review of Economic Evaluation in Oral Cancer and OPMD screening

|                     |                                                                                                                                       |
|---------------------|---------------------------------------------------------------------------------------------------------------------------------------|
| Oral cancer         | Mouth-neoplasm or Gingival-neoplasm or Lip-neoplasm or Tongue-neoplasm or squamous cell carcinoma* or buccal mucosa or oral carcinoma |
| OPMD                | Leukoplakia-oral or premalig* or pre-malig* oral or oral potential* malig* or oral dysplasia or oral lesion*                          |
| screening           | Screening or Diagnosis or oral examination or diagnostic test                                                                         |
| Economic evaluation | Economic or Cost or Cost effectiveness or Cost utility or Cost benefit                                                                |
| Exclusion           | Not skin or breast or lung or anal or viral or colorectal or cervical or liver or gastric                                             |

#### Example of search process using Boolean operators in COCHRANE

|     |                                                                                                                                       |
|-----|---------------------------------------------------------------------------------------------------------------------------------------|
| #1  | Mouth-neoplasm or Gingival-neoplasm or Lip-neoplasm or Tongue-neoplasm or squamous cell carcinoma* or buccal mucosa or oral-carcinoma |
| #2  | Leukoplakia-oral or oral premalig* or pre-malig* oral or oral potential* malig* or oral dysplasia or oral lesion*                     |
| #3  | #1or#2                                                                                                                                |
| #4  | Screening or Diagnosis or oral-examination or visual examination or diagnostic test                                                   |
| #5  | #3 and #4                                                                                                                             |
| #6  | Economic or Cost or Cost effectiveness or Cost utility or Cost benefit                                                                |
| #7  | #5 and #6                                                                                                                             |
| #8  | #7 with Cochrane Library publication date Between Jan 2000 and Jan 2019                                                               |
| #9  | #7 and adult                                                                                                                          |
| #10 | #9 not (lung or skin or stroke or diabetes or pain or schizo*)                                                                        |
