# Supplementary material for: Economic Evaluation of Oral Cancer Screening Programs: Review of Outcomes and Study Designs
Source: Healthcare (Basel). 2023 Apr 21;11(8):1198. doi: 10.3390/healthcare11081198 (PMC10138408; doi:10.3390/healthcare11081198)
Supplement: Supplementary file 1 [file healthcare-11-01198-s001.zip]

Archive with 4 entries (4 files):
- Supplementary Material Table S1.pdf
- Supplementary Material Table S2.pdf
- Supplementary Material Table S3.pdf
- Supplementary Material Table S4.pdf
